# Supplementary material
Source: publisher figshare collection journal article supplement (https://acs.figshare.com/ndownloader/files/4028236)
Supplement: Supplementary file 1 [file 4028236]

*Supporting Information of*

# The Robust Hydrogel Hierarchically Assembled from a pH Sensitive Peptide Amphiphile Based on Silk Fibroin

*Hui Guo, Jinming Zhang, Tao Xu, Zhidong Zhang, Jinrong Yao, and Zhengzhong Shao\**

State Key Laboratory of Molecule Engineering of Polymers, Laboratory of Advanced  
Materials and Department of Macromolecular Science, Fudan University, 220 Handan  
Road, Shanghai, 200433, People's Republic of China

\*Address correspondence to:

E-mail: [zzshao@fudan.edu.cn](mailto:zzshao@fudan.edu.cn)

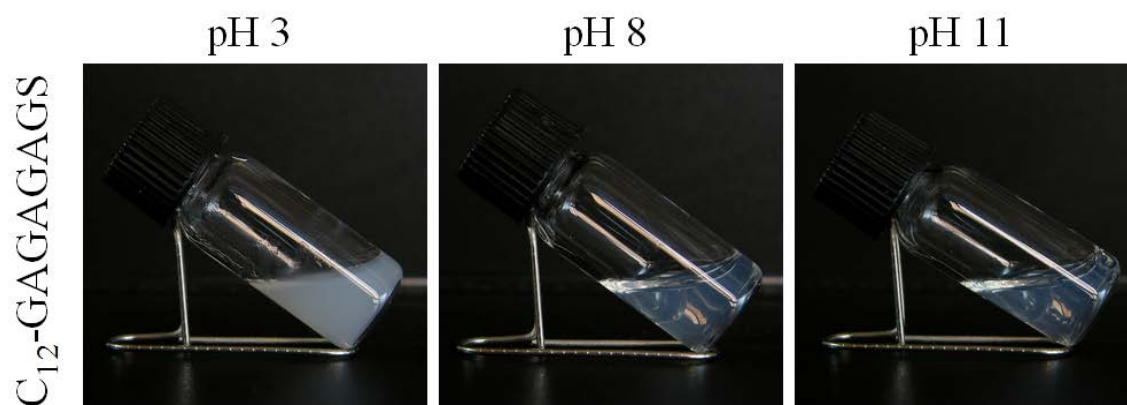

Figure S1.  $C_{12}$ -GAGAGAGS/ $H_2O$  system (1 wt %) at pH 3, pH 8 and pH 11.

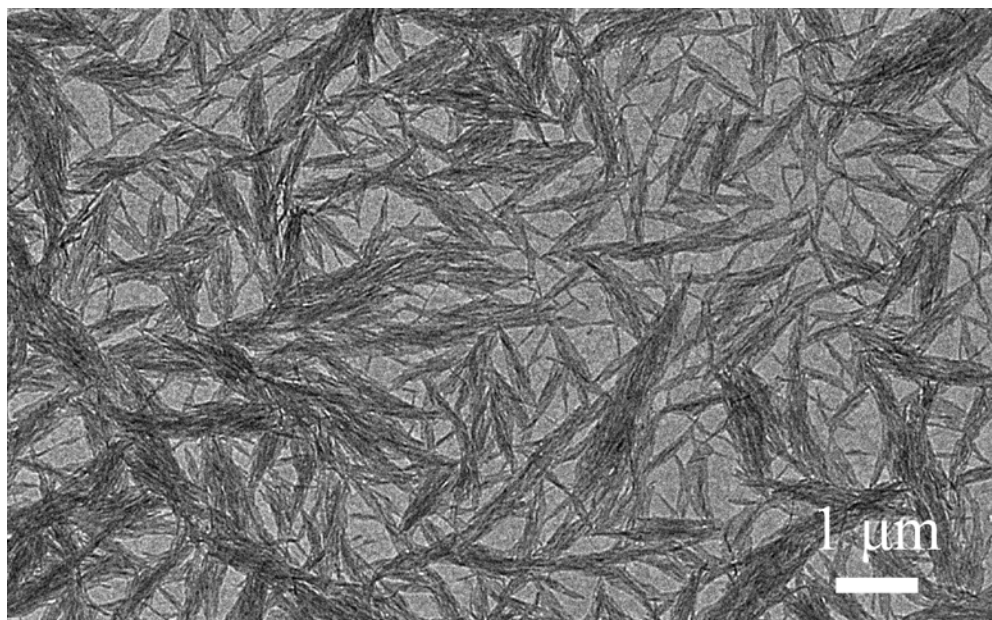

Figure S2. TEM images of  $C_{12}$ -GAGAGAGS assembly and aggregates (negatively stained by uranyl acetate) at pH 11

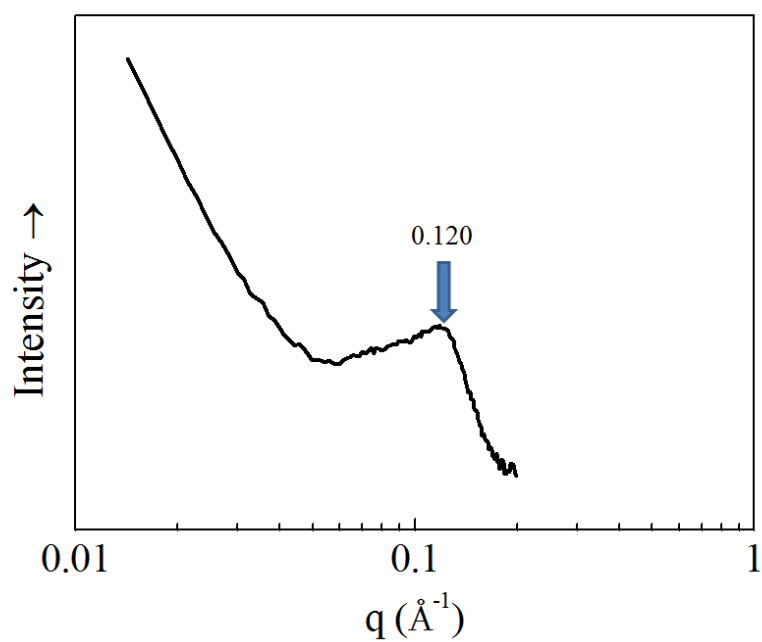

Figure S3. SAXS results of  $C_{12}$ -GAGAGAGY hydrogel after freeze drying

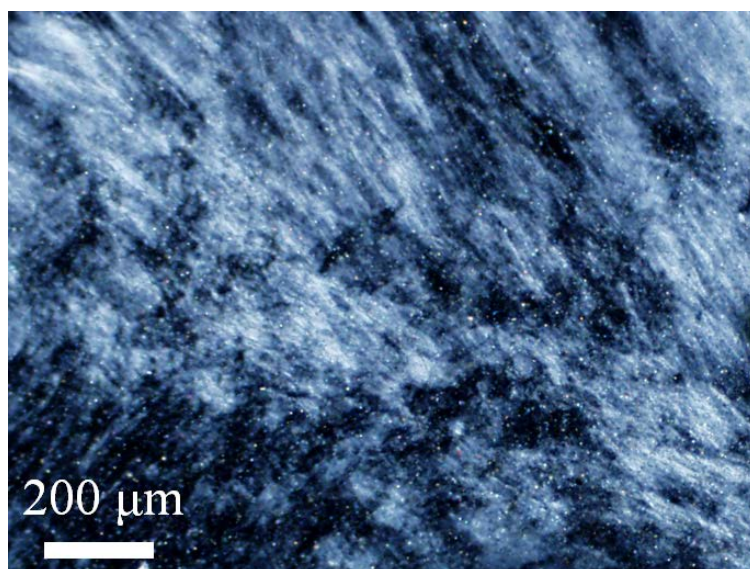

Figure S4. POM image of the  $C_{12}$ -GAGAGAGY hydrogel formed at lower pH (pH<4, the light spots were attributed to salts) .

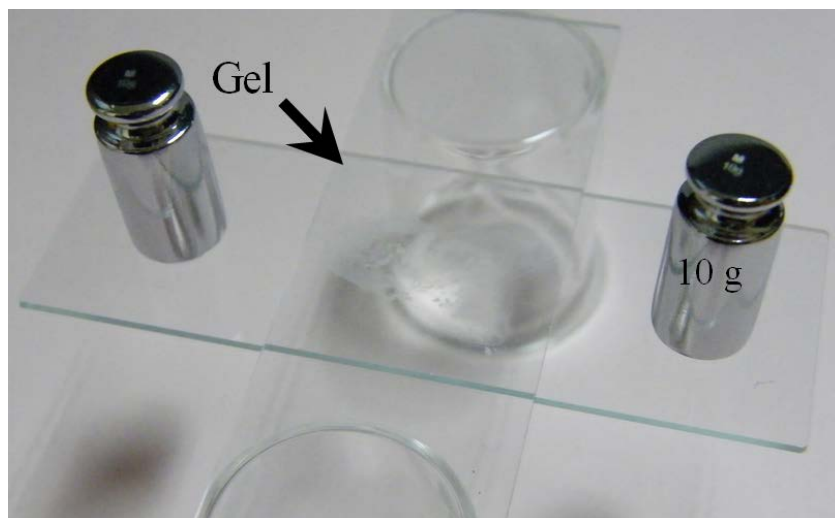

Figure S5. The PAs hydrogel can be used as adhesive, with adhesive force over 400 N/m<sup>2</sup>.

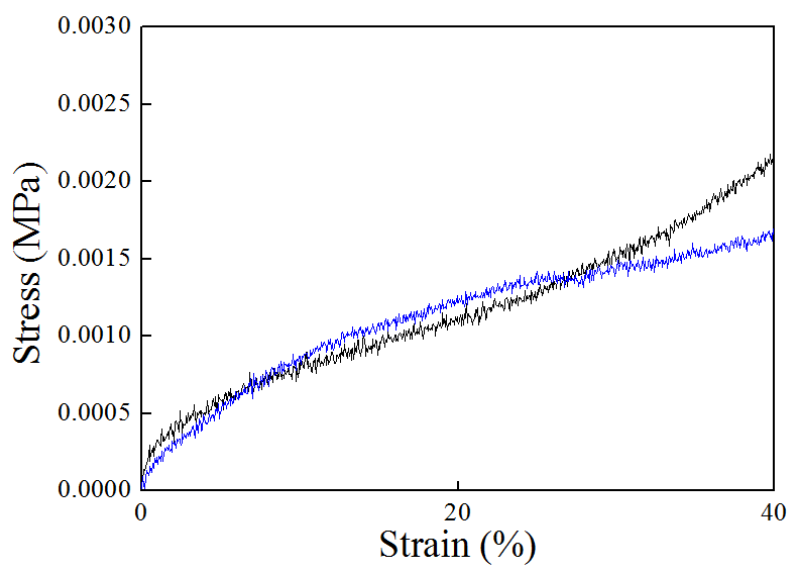

Figure S6. Compression test result of the C<sub>12</sub>-GAGAGAGY hydrogels (1 wt %). The calculated compression modulus is around 10<sup>4</sup> Pa.
